# Supplementary material
Source: Springer Nature journal article supplement (http://www.springermedizin.de/resource/supplementary/13063_2014_2161_MOESM5_ESM.pdf/9621486)
Supplement: MOESM5 [file 9621486]

```

* Macro that executes k-arm minimization;
* A random vector of covariates is generated for testing purposes;
* In a real trial, the vector of covariates of the patient in generation GEN should be read from the real one-observation dataset;
options noprint;
%macro mink[n=,
              k=3,
              nfact=2,
              lev1=2,
              lev2=2,
              pnon=0.1,
              mseed=1971,
              outdata=
/*the number of patients to be allocated*/
/*number of treatment arms*/
/*number of factors minimization baalnces upon*/
/*number of levels of teh first factor*/
/*number of levels of the second factor, add more macr variables Levi if NFACT>2*/
/*probability to allocate non-preferred treatment*/
/*random seed*/
/*the dataset to store the complete allocation log*/];
*0. generate and store the dataset with the random string of a uniformly distributed variable;
data uni; do gen=1 to &n; ranu=ranuni[&mseed]; output; end; run;
*proc print data=uni;*run;
*1. generate the sequence of covariates for testing purposes modify code for allocation in a real trial;
data covs; n=&n; do i=1 to n; gen=i; %do f=1 %to &nfact; rand&f=ranuni[3171];
%do lev=1 %to &&lev&f; c&f_&lev=[ceil[rand&f*&&lev&f]=&lev];
%end; %end; output; end; run;
proc print data=covs;run;
* 2. initiate the treatment totals;
data totals; * marginal totals for each treatment;
%do i=1 %to &k; %do f=1 %to &nfact; %do lev=1 %to &&lev&f;
t&i_&f_&lev=0; %end; %end; %end; run;
* treatment I total for level LEV of the factor F;
* initiate dataset to store all allocation records with complete info;
data store;gen=0;run;
proc print data=totals;run;
* 3. assign the treatments;
%do gen=1 %to &n;
data assign; merge covs[where=(gen=&gen)]/*covariates of the AN=gen are merged in, edit for real trial*/
keep=gen %do f=1 %to &nfact; %do lev=1 %to &&lev&f; c&f_&lev
%end; %end; ]
totals uni[where=(gen=&gen)]; *merge in uniform random variable ranu;
k=&k; %do i=1 %to &k;
*calculate the imbalance function assuming that the patient is assigned TRT I;
* imbalance is the sum of the marginal ranges of the number of treatments across the factor levels of the patient in generation &gen;
%do f=1 %to &nfact; %do lev=1 %to &&lev&f; if c&f_&lev=1 then do; %do j=1 %to &k;
%if &j=&i %then %do; if&i_&f_&j=t&j_&f_&lev+1;
%end; %else %do; if&i_&f_&j=t&j_&f_&lev;
%end; %end; %end; %end; %end; %end;
*other treatments total in the new patient level of Factor F;
%end; %end; end; %end;
*now all treatment totals if. assuming I is assigned are derived ;
*derive the range of trts within the factor F if TRT I is assigned;
rg&i_&f=range[of if&i_&f_1-if&i_&f_&k];
*derive sum of ranges across all factors - total imbalance for group I;
totrg&i=sum[of rg&i_1-rg&i_&nfact]; %end; %end;
*derive minimum of total imbalances across k groups;
mi=min[of totrg1-totrg&k];
* derive w - number of treatment groups that have total imbalance equal to mi;
w=0; %do i=1 %to &k; if totrg&i=mi then w=w+1; %end;
if w=k then do;
%do i=1 %to &k; p&i=1/k; %end; end; else do;
*if all groups have equal total imbalance, they are allocated in equal ratio ;
*if W groups have total imbalance equal to minimum total imbalance MI [preferred groups], each of them are allocated with probability [1-&pnon]/w. The remaining [K-W] non-preferred groups are
allocated with probability &pnon/[k-w] each;
%do i=1 %to &k; if totrg&i=mi then p&i=[1-&pnon]/w; else p&i=&pnon/[k-w]; %end; end;
*choose treatment TRT out of 1-K with probabilities p1-pk using uniform random variable RANU from the merged in dataset UNI;
if ranu le p1 then trt=1;else %do i=2 %to &k; if ranu le sum[of p1-p&i] then trt=&i;else %end;;
*update the treatment totals with NEWTOTALS ;
%do i=1 %to &k; if &i=trt then do;%do f=1 %to &nfact; %do lev=1 %to &&lev&f;
if c&f_&lev=1 then t&i_&f_&lev=t&i_&f_&lev+1;
%end;%end;%end;%end;
*assigned treatment totals are increased by 1 for levels of the Subject GEN;
%end;%end;%end;%end;
*derive the treatment totals;
%do i=1 %to &k; tot&i=sum[of t&i_1_1-t&i_1_&lev1]; %end; run;
*proc print data=assign;*title "gen=&gen"; *run;
* 4. update the dataset ttotals;
data ttotals; * marginal totals for each treatment;
set assign;
keep %do i=1 %to &k; %do f=1 %to &nfact; %do lev=1 %to &&lev&f; t&i_&f_&lev
%end;%end;%end;; run;
*proc print data=ttotals;*title "gen=&gen"; *run;
*5. append ASSIGN to randomiztaion log;
data store;set store assign;if gen>0;run;
*proc print data=store;*title "gen=&gen"; *run;
%end;
data &outdata;set store;run; *complete allocation log;
proc print data=&outdata; title 'randomization log'; run;
%mend mink; %mink[n=30, k=3,nfact=2, lev1=2, lev2=2, pnon=0.1,mseed=1971, outdata=test1];

```
